# Supplementary material for: Dynamic, Electrostatic Model for the Generation and Control of High-Energy Radical Intermediates by a Coenzyme B12-Dependent Enzyme
Source: PubMed Central journal article supplement — Chembiochem. 2013 Aug 19;14(13):1529–33. doi: 10.1002/cbic.201300420 (PMC4155860; doi:10.1002/cbic.201300420), 2013-08-19
Supplement: cbic0014-1529-SD1.pdf [file cbic0014-1529-SD1.pdf]

# CHEMBIOCHEM

## Supporting Information

© Copyright Wiley-VCH Verlag GmbH & Co. KGaA, 69451 Weinheim, 2013

### **Dynamic, Electrostatic Model for the Generation and Control of High-Energy Radical Intermediates by a Coenzyme B<sub>12</sub>-Dependent Enzyme**

Zhi-Gang Chen,<sup>[a]</sup> Monika A Ziętek,<sup>[b]</sup> Henry J. Russell,<sup>[b]</sup> Shirley Tait,<sup>[b]</sup> Sam Hay,<sup>[b]</sup>  
Alex R. Jones,<sup>\*[c]</sup> and Nigel S. Scrutton<sup>\*[b]</sup>

cbic\_201300420\_sm\_miscellaneous\_information.pdf

## Experimental Section

### Materials.

Ccoenzyme B12 (> 98 % Sigma), methylcobalamin (Sigma), 2-aminoethanol (ethanolamine, > 99 % Sigma), yeast alcohol dehydrogenase (YADH from *Saccharomyces cerevisiae*,  $\geq 300$  units  $\text{mg}^{-1}$  protein, Sigma) and  $\beta$ -nicotinamide adenine dinucleotide ( $\beta$ -NADH, Sigma) were used as purchased without further purification. The plasmid, pET-SEAL, encoding the small (32.0 kDa) and large (49.1 kDa) subunits of wild-type (WT) EAL from *Salmonella enterica* (kindly donated by Prof. George Reed) was overexpressed in *E. coli* and purified as described previously.<sup>[1]</sup> Site-directed mutagenesis was performed using Phusion kit (New England Biolabs), using the following primers: 5'-GCCTGTA~~CTTT~~GACACCGGGCAAGGG-3' (for E287D); CAA (for E287Q); GCA (for E287A). All EAL E287 variants were overexpressed and purified as for the WT protein (SDS PAGE, Figure S2).

### Coenzyme binding

An excess of each coenzyme (coenzyme B<sub>12</sub> / methylcobalamin) was added to separate samples of the EAL wild-type and E287 variants and incubated on ice for 10-15 minutes. Unbound cofactor was removed by passing down a CentriPure P25 gel filtration column (emp BIOTECH). UV-visible spectra were then acquired between 200-800 nm.

### Steady-state turnover.

The activity of each EAL variant was measured using a coupled assay similar to that described by Kaplan and Stadtman.<sup>[2]</sup> Briefly, the consumption of NADH (150  $\mu\text{M}$ ) was monitored by spectrophotometry at 340 nm as the product of the EAL catalysed reaction, acetaldehyde, was turned over by YADH (100 units  $\text{ml}^{-1}$ ). Final EAL concentrations were: WT, 5 nM and E287D/Q/A, 1-1.5  $\mu\text{M}$ . Data were acquired using an Agilent Cary 60 UV-Vis Spectrophotometer in a final volume of 1 ml under both aerobic and anaerobic conditions in HEPES (100 mM), pH 7.5 at 25 °C. Anaerobic data were acquired in a Belle Technology glove box. Steady-state kinetic parameters were calculated by fitting the initial rate as a function of substrate (2-aminoethanol) concentration to the Michaelis-Menten equation (Figure S4a-e and Equation (1)).

### Stopped-flow spectrometry.

Single wavelength measurements were made at 525 nm under aerobic and anaerobic conditions in an Applied Photophysics SX.18 MV-R stopped-flow spectrophotometer. Data were acquired in HEPES (100 mM), pH 7.5 at 25 °C after rapid mixing of EAL variants (E287D/Q, 30-40  $\mu\text{M}$  final concentration) with equal volumes of saturating concentrations of 2-aminoethanol (60 mM final concentration). Anaerobic data were acquired in a Belle Technology glove box. Data were fit to a single exponential function where possible to extract the observed pre-steady-state rate coefficient,  $k_{\text{obs}}$ .

### Substrate titration into E287A.

2-aminoethanol (final concentration of 110 mM) was added to E287A ( $\sim 10$   $\mu\text{M}$ ) and a spectrum acquired between 300-700 nm in an Agilent Cary 60 UV-Vis Spectrophotometer at 60 s intervals until spectral changes ceased. Data were acquired under both aerobic and anaerobic conditions in a 100  $\mu\text{l}$  cuvette, HEPES (200 mM), pH 7.5 at 25 °C. Anaerobic data were acquired in a Belle Technology glove box.

## Figures

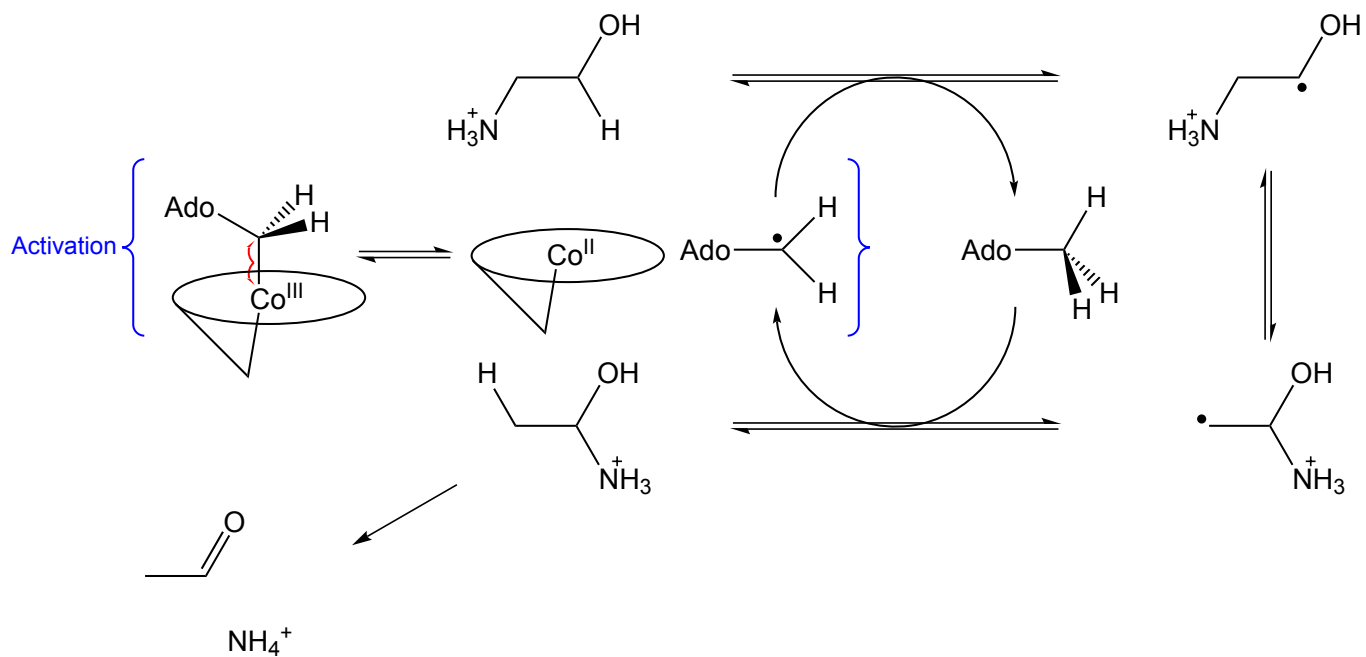

**Figure S1.** Proposed cycle of the coenzyme  $\text{B}_{12}$ -dependent ethanolamine ammonia lyase catalysed conversion of 2-aminoethanol to ethanal and ammonia. Refer to main article for description.

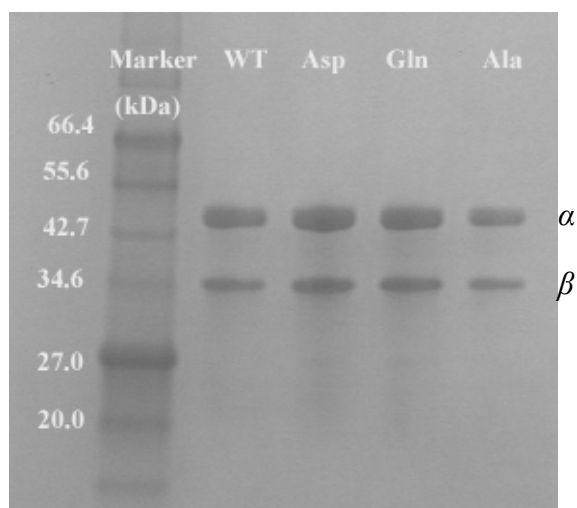

**Figure S2.** SDS-PAGE of WT, E287D (Asp), E287Q (Gln), and E287A (Ala) variants of EAL. The bands for the small ( $\beta$ , 32.0 kDa) and large ( $\alpha$ , 49.1 kDa) subunits are indicated.

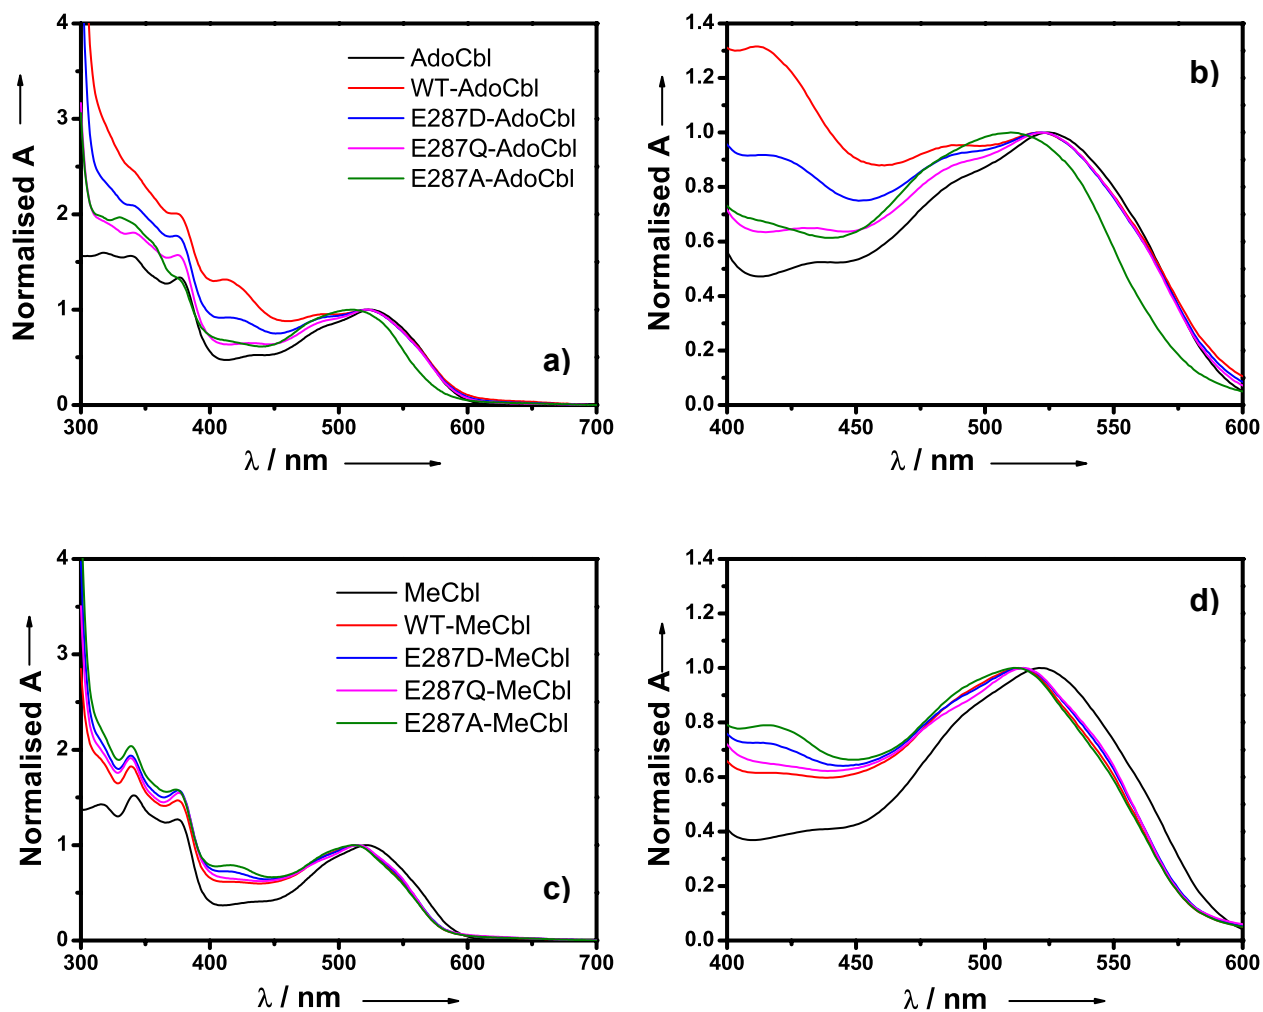

**Figure S3.** Normalised UV-visible spectra of **a-b)** 5'-deoxyadenosylcobalamin (AdoCbl, coenzyme B<sub>12</sub>) and **c-d)** methylcobalamin (MeCbl) both free in aqueous solution and bound to the EAL variants (WT, E287D, E287Q and E287D). The spectra were normalised between 700 nm ( $A=0$ ) and the peak of the  $\alpha\beta$  absorption band ( $A=1$ ). The peak of the  $\alpha\beta$  absorption band in each case is blue-shifted by varying extents (b & d, Table S1 and Figure 2). There is more general variation between the EAL variants in the protein bound spectra for B<sub>12</sub> (a) than for methylcobalamin (c), especially between 300-500 nm. This, and the nature of the  $\alpha\beta$  band blue shift (see Figure 2, Table S1 and discussion in main article), suggest significant interaction between E287 and the protein through direct contact with the upper axial 5'-deoxyadenosylcobalamin.

|       | Peak of $\alpha\beta$ absorption band ( $\pm 2$ nm) |       |
|-------|-----------------------------------------------------|-------|
|       | AdoCbl                                              | MeCbl |
| Free  | 525                                                 | 521   |
| E287D | 522                                                 | 515   |
| WT    | 520                                                 | 513   |
| E287Q | 522                                                 | 515   |
| E287A | 510                                                 | 512   |

**Table S1.** Peak values of the  $\alpha\beta$  absorption band for 5'-deoxyadenosylcobalamin (AdoCbl, coenzyme B<sub>12</sub>) and methylcobalamin (MeCbl) both free in aqueous solution and bound to the EAL variants (WT, E287D, E287Q and E287D). See also Figures 2 and S3a-d. The EAL variants are arranged from top to bottom in order of increasing hydrophobicity of the 287 residue (Asp < Glu < Gln < Ala).

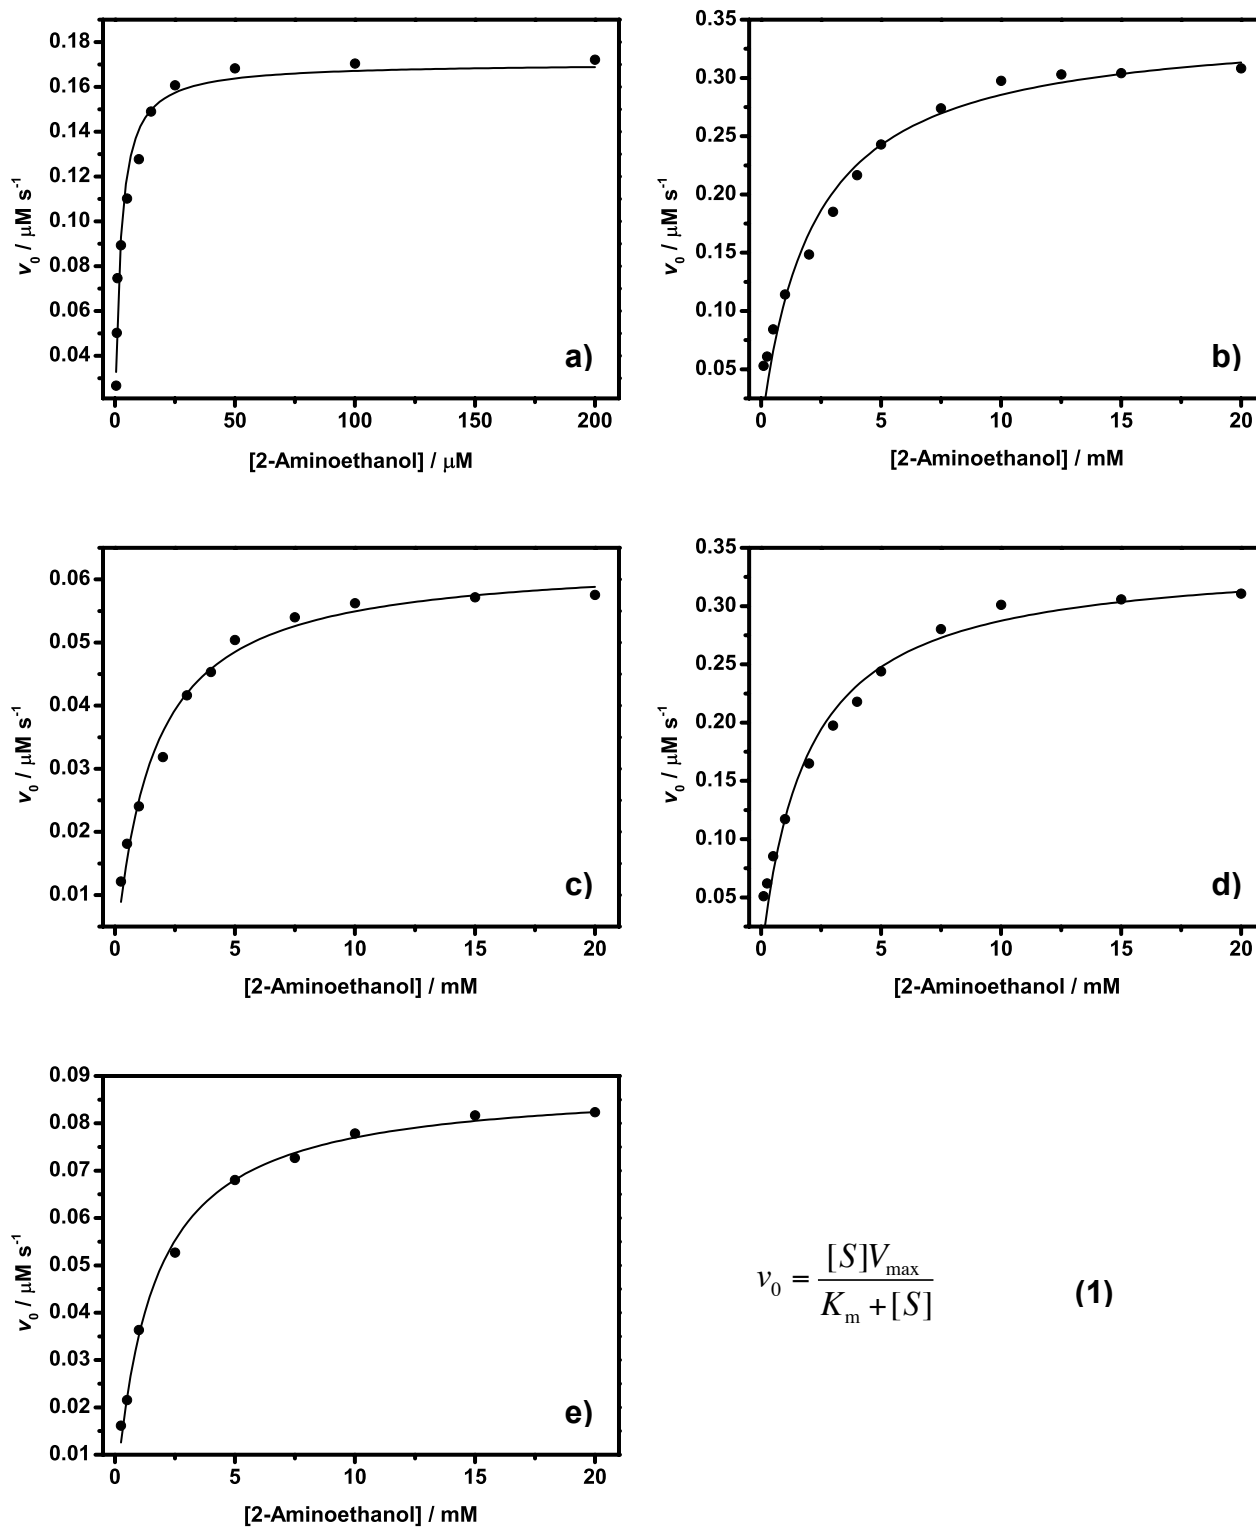

**Figure S4** Initial velocity ( $v_0$ ) as a function of [2-aminoethanol] measured for EAL variants: **a)** WT – aerobic, **b)** E287D – aerobic, **c)** E287Q – aerobic, **d)** E287D – anaerobic, **e)** E287Q – anaerobic. All data were fit to the Michaelis-Menten equation (1), and  $k_{\text{cat}}$  calculated from  $V_{\max} / [E]_0$ , where  $[E]_0$  = EAL variant concentration.

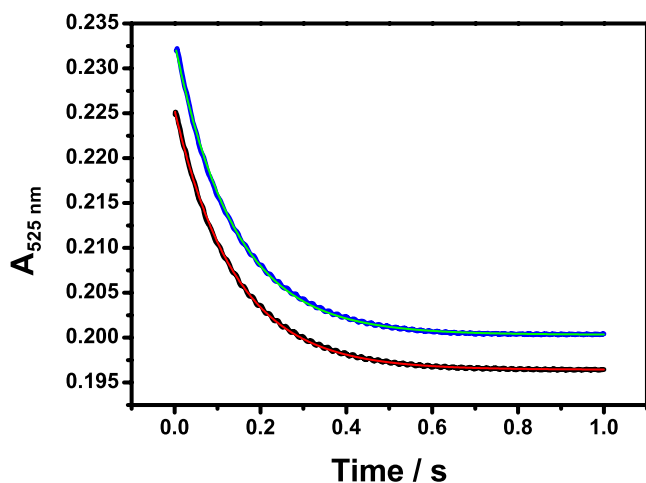

**Figure S5.** Pre-steady-state traces and single exponential fits representing the change in absorbance at 525 nm after rapid mixing of the E287D variant with 2-aminoethanol (2AE). Black (data) and red (fit) – 50 mM 2AE,  $k_{\text{obs}} = 7.10 \pm 0.29$ ; blue (data) and green (fit) – 60 mM 2 AE,  $k_{\text{obs}} = 7.29 \pm 0.18$ . The rates are the same within error, suggesting saturating concentrations of substrate.

## References

- [1] V. Bandarian, G. H. Reed, *Biochemistry* **1999**, *38*, 12394-12402.
- [2] B. H. Kaplan, E. R. Stadtman, *J. Biol. Chem.* **1968**, *243*, 1787-1793.
